# Supplementary material for: Predicting Hospitalised Paediatric Pneumonia Mortality Risk: An External Validation of RISC and mRISC, and Local Tool Development (RISC-Malawi) from Malawi
Source: PubMed Central journal article supplement (PMC5193399; doi:10.1371/journal.pone.0168126), 2016-12-28
Supplement: pone.0168126.s001.pdf [file pone.0168126.s001.pdf]

**S1 Table: Comparison of subjects with missing data (excluded from RISC (HIV-uninfected) analysis) and with complete data**

| <b>Variable</b>                    | <b>Complete Data<br/>n=9533</b> | <b>Missing Data<sup>1</sup><br/>n=4586</b> |
|------------------------------------|---------------------------------|--------------------------------------------|
| Overall CFR                        | 2.0% (1.8-2.3%)                 | 5.9% (5.3-6.7%)                            |
| Sex                                | Male 56.3% Female 43.7%         | Male 55.7% Female 44.3%                    |
| Age                                | 8.7 months                      | 9.4 months                                 |
| Moderate malnutrition <sup>2</sup> | 9.8%                            | 9.2%                                       |
| Severe malnutrition <sup>2</sup>   | 6.12%                           | 7.5%                                       |
| Pneumonia severity                 |                                 |                                            |
| Danger Sign                        | n=3880 CFR 3.5% (2.9-4.1%)      | n=920 CFR 13.5% (11.3-15.9%)               |
| Chest-indrawing                    | n=5175 CFR 1.0% (0.7-1.3%)      | n=2640 CFR 4.6% (3.8-5.5%)                 |
| Fast breathing                     | n=365 CFR 0.5% (0.1-2.0%)       | n=483 CFR 1.7% (0.7-3.2%)                  |

Malnutrition defined by WHO weight-for-age z-score criteria

CFR: Case Fatality Rate

<sup>1</sup>Subjects with missing data were excluded from the RISC (HIV-uninfected) external validation.

<sup>2</sup>Missing in 22% of missing data cohort
