# Supplementary material for: Predicting Hospitalised Paediatric Pneumonia Mortality Risk: An External Validation of RISC and mRISC, and Local Tool Development (RISC-Malawi) from Malawi
Source: PubMed Central journal article supplement (PMC5193399; doi:10.1371/journal.pone.0168126), 2016-12-28
Supplement: pone.0168126.s002.pdf [file pone.0168126.s002.pdf]

**S2 Table: RISC (HIV-uninfected) c-statistics, likelihood ratios (LR), and case fatality rates (CFR) at score cutoffs by subgroup**

|                                            | <b>HIV-uninfected<br/>n=1999<br/>CFR 1.45%</b>     | <b>HIV-unknown<br/>n=6934<br/>CFR 1.93%</b>         | <b>HIV-infected<br/>n=152<br/>CFR 6.58%</b>         | <b>HIV-exposed<br/>n=448<br/>CFR 4.46%</b>           | <b>ALL<br/>n=9533<br/>CFR 2.02%</b>                 |
|--------------------------------------------|----------------------------------------------------|-----------------------------------------------------|-----------------------------------------------------|------------------------------------------------------|-----------------------------------------------------|
| C-statistic                                | 0.62 (0.5-0.74)                                    | 0.72 (0.67-0.77)                                    | 0.69 (0.55-0.84)                                    | 0.79 (0.71-0.87)                                     | 0.72 (0.68-0.76)                                    |
| <b>≤ 3<br/>CFR<br/>(95%CI)</b>             | 1868 (93.45%)<br>1.07%<br>(0.66-1.65%)             | 6453 (93.06%)<br>1.44%<br>(1.16-1.76%)              | 130 (85.53%)<br>5.38%<br>(2.19-10.78%)              | 378 (84.38%)<br>2.65%<br>(1.28-4.81%)                | 8829 (92.62%)<br>1.47%<br>(1.23-1.75%)              |
| <b>≥ 4<br/>CFR<br/>(95%CI)<br/>LR+ LR-</b> | 131 (6.55%)<br>6.87%<br>(3.19-12.64%)<br>5.01 0.74 | 481 (6.94%)<br>8.52%<br>(6.19-11.39%)<br>4.73 0.74  | 22 (14.47%)<br>13.64%<br>(2.91-34.9%)<br>2.24 0.81  | 70 (15.62%)<br>14.29%<br>(7.07-24.71%)<br>3.57 0.58  | 704 (7.38%)<br>8.95%<br>(6.94-11.30%)<br>4.76 0.72  |
| <b>≤ 2<br/>CFR<br/>(95%CI)</b>             | 1590 (79.54%)<br>1.01%<br>(0.58-1.63%)             | 5360 (77.30%)<br>1.01%<br>(0.76-1.31%)              | 104 (68.42%)<br>4.81%<br>(1.58-10.86%)              | 289 (64.51%)<br>1.38%<br>(0.38-3.50%)                | 7343 (77.03%)<br>1.08%<br>(0.85-1.33%)              |
| <b>≥ 3<br/>CFR<br/>(95%CI)<br/>LR+ LR-</b> | 409 (20.46%)<br>3.18%<br>(1.70-5.37%)<br>2.23 0.69 | 1574 (22.70%)<br>5.08%<br>(4.05-6.29%)<br>2.72 0.52 | 48 (31.58%)<br>10.42%<br>(3.47-22.66%)<br>1.65 0.72 | 159 (35.49%)<br>10.06%<br>(5.86-15.83%)<br>2.39 0.30 | 2190 (22.97%)<br>5.21%<br>(4.31-6.22%)<br>2.66 0.53 |

LR+: Positive Likelihood Ratio

LR-: Negative Likelihood Ratio
